# Supplementary material for: Linkage and acceptor effects on diverse memory behavior of triphenylamine-based aromatic polymers
Source: Royal Society of Chemistry journal article supplement (doi:10.1039/c3py00500c), 2013-01-01
Supplement: c3py00500c.pdf [file c3py00500c.pdf]

## Supporting Information

### Linkage and Acceptor Effect on Diverse Memory Behavior of Triphenylamine-Based Aromatic Polymers

By *Chih-Jung Chen, Yi-Cheng Hu, and Guey-Sheng Liou\**

Functional Polymeric Materials Laboratory, Institute of Polymer Science and Engineering,  
National Taiwan University, Taipei, Taiwan

Tel: +886-2-336-5315; Fax: +886-2-336-5237; E-mail: [gsliou@ntu.edu.tw](mailto:gsliou@ntu.edu.tw)

#### List of Contents for Supplementary Material:

---

|                                                                                                                                                            |             |
|------------------------------------------------------------------------------------------------------------------------------------------------------------|-------------|
| <b>Figure S1.</b> IR spectra of (a) polyether OXPE and (b) polyester 6FPET .....                                                                           | <u>SI-2</u> |
| <b>Figure S2.</b> TGA thermograms and DSC traces of 6FPET and OXPE.....                                                                                    | <u>SI-2</u> |
| <b>Figure S3.</b> Reduction cyclic voltammetric diagrams of <b>6FPI</b> and <b>6FPI'</b> films on an<br>ITO-coated glass substrate over cyclic scans.....  | <u>SI-3</u> |
| <b>Figure S4.</b> Calculated molecular orbitals and corresponding energy levels of the basic units<br>(BU) for TPA-based sulfonyl-containing polymers..... | <u>SI-4</u> |
| <b>Table S1.</b> Molecular Weights.....                                                                                                                    | <u>SI-5</u> |
| <b>Table S2.</b> Solubility Behavior.....                                                                                                                  | <u>SI-5</u> |

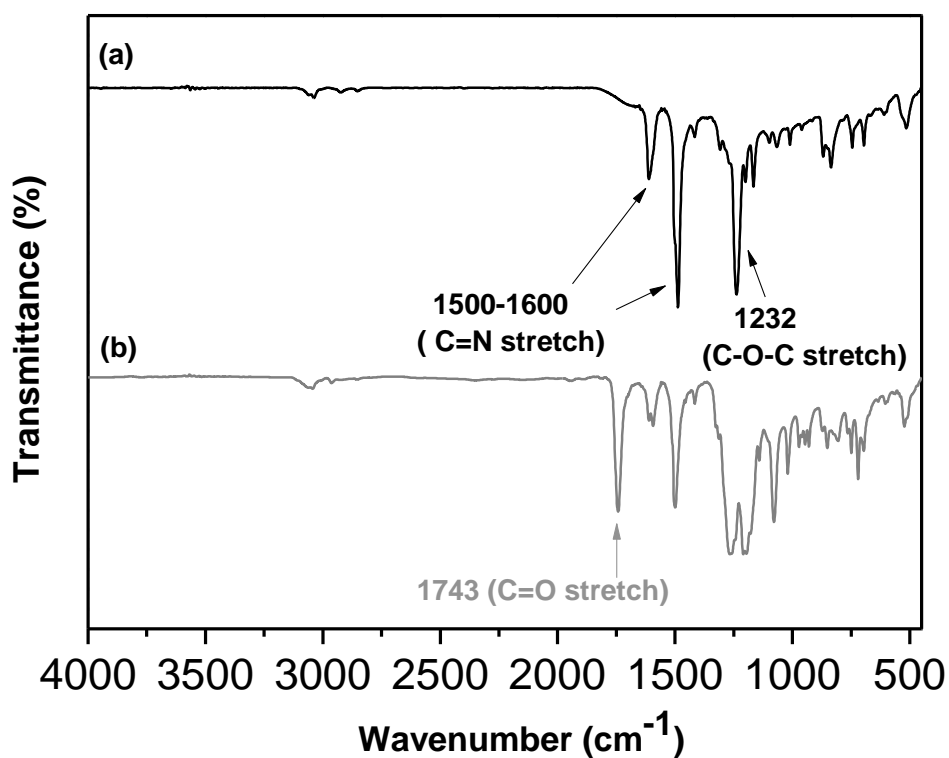

Figure S1. IR spectra of (a) polyether OXPE and (b) polyester 6FPET.

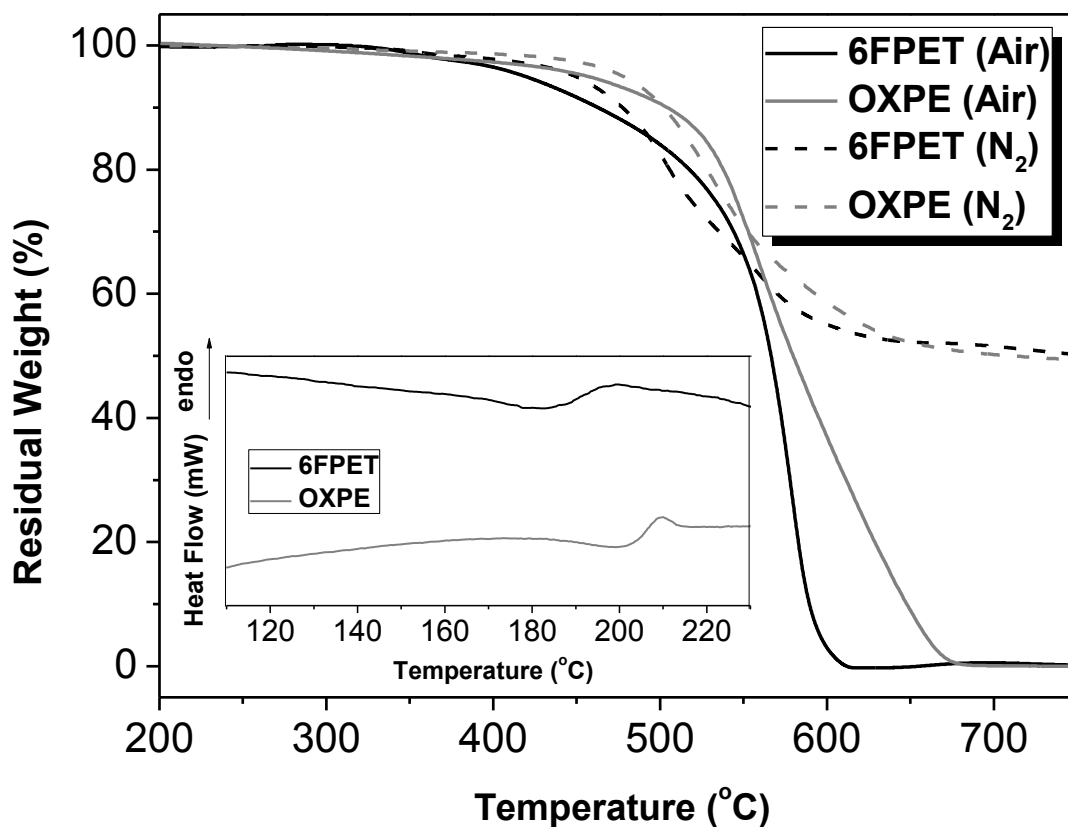

Figure S2. TGA thermograms and DSC traces of 6FPET and OXPE.

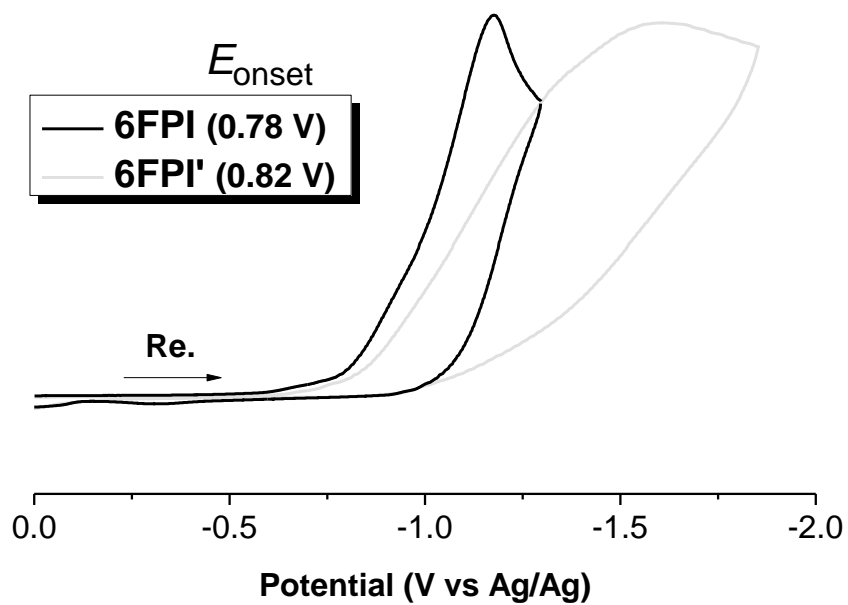

**Figure S3.** Reduction Cyclic voltammetric diagrams of **6FPI** and **6FPI'** films on an ITO-coated glass substrate over cyclic scans.

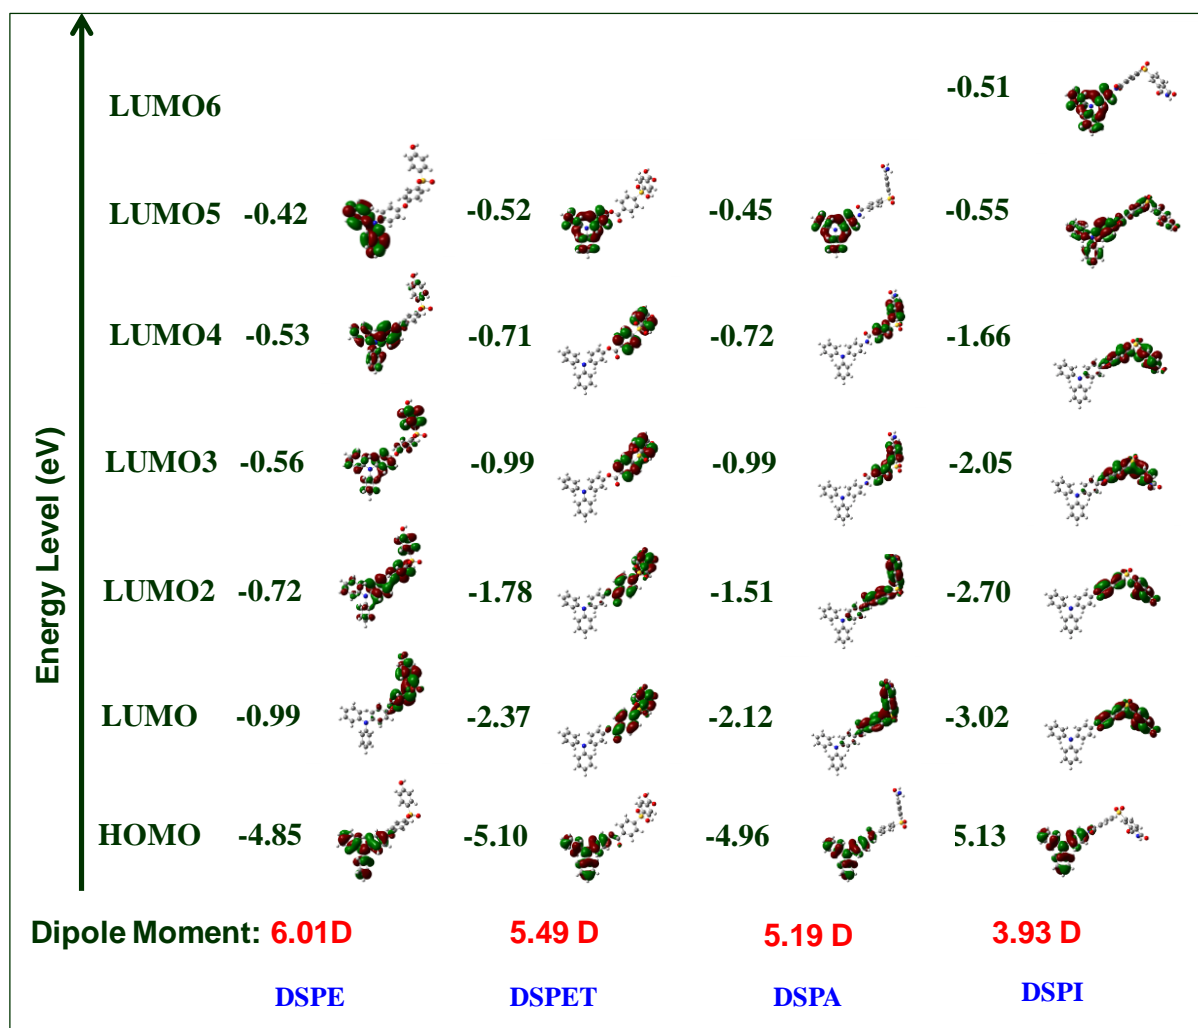

**Figure S4.** Calculated molecular orbitals and corresponding energy levels of the basic units (BU) for TPA-based sulfonyl-containing polymers.

**Table S1.** Molecular Weights<sup>d</sup>

| Polymer      | $\eta_{inh}^a$ (dL/g) | $M_w^b$ | $M_n^b$ | PDI <sup>c</sup> |
|--------------|-----------------------|---------|---------|------------------|
| <b>OXPE</b>  | 0.27                  | 62,000  | 24,000  | 2.58             |
| <b>6FPET</b> | 0.28                  | 76,000  | 30,000  | 2.53             |
| <b>6FPA</b>  | 0.75                  | 123,500 | 67,000  | 1.84             |
| <b>6FPI</b>  | 0.57                  | 166,000 | 93,000  | 1.78             |
| <b>6FPI'</b> | 0.63                  | 99,500  | 52,000  | 1.91             |

<sup>a</sup> Measured at a polymer concentration of 0.5 g/dL in DMAc at 30 °C.

<sup>b</sup> Calibrated with polystyrene standards, using NMP as the eluent at a constant flow rate of 0.5 mL/min at 40 °C.

<sup>c</sup> Polydispersity Index ( $M_w/M_n$ ).

**Table S2.** Solubility Behavior

| Code         | Solubility in various Solvent <sup>a</sup> |      |     |     |                   |      |                  |
|--------------|--------------------------------------------|------|-----|-----|-------------------|------|------------------|
|              | NMP                                        | DMAc | DMF | THF | CHCl <sub>3</sub> | DMSO | <i>m</i> -cresol |
| <b>OXPE</b>  | ++                                         | ++   | +   | +   | ++                | –    | +                |
| <b>6FPET</b> | ++                                         | ++   | +–  | ++  | ++                | –    | +                |

<sup>a</sup> The solubility was determined with a 10 mg sample in 1 mL of a solvent. ++, soluble at room temperature; +, soluble on heating at 70°C-80°C; +–, partially soluble or swelling; –, insoluble even on heating.
